# Supplementary material
Source: publisher figshare collection journal article supplement (https://gsajournals.figshare.com/ndownloader/files/21348072)
Supplement: Supplementary file 1 [file 21348072]

## Sheet: br-induced
Table S3: KEGG pathway analysis results for genes differentially regulated between w1118 and br5 leg imaginal discs
Sheet 1: KEGG pathway analysis results for genes up-regulated in w1118 leg imaginal discs
geneSet	description	link	size	overlap	expect	enrichmentRatio	pValue	FDR	overlapId	userId
dme00010	Glycolysis / Gluconeogenesis	http://www.kegg.jp/kegg-bin/show_pathway?dme00010+43447+33351+43582+45875+33461+36060+44010+43183+32545	55	9	0.483213	18.6253	3.7e-10	4.78e-08	43447;33351;43582;45875;33461;36060;44010;43183;32545	FBgn0001092;FBgn0086355;FBgn0000579;FBgn0250906;FBgn0000064;FBgn0014869;FBgn0003071;FBgn0001186;FBgn0003076
dme01230	Biosynthesis of amino acids	http://www.kegg.jp/kegg-bin/show_pathway?dme01230+43447+33351+43582+33461+36060+43183+32545	66	7	0.579856	12.072	9.93e-07	6.41e-05	43447;33351;43582;33461;36060;43183;32545	FBgn0001092;FBgn0086355;FBgn0000579;FBgn0250906;FBgn0000064;FBgn0014869;FBgn0003071
dme01200	Carbon metabolism	http://www.kegg.jp/kegg-bin/show_pathway?dme01200+43447+33351+43582+45875+33461+36060+43183+32545	117	8	1.02793	7.78266	4.37e-06	0.000188	43447;33351;43582;45875;33461;36060;43183;32545	FBgn0001092;FBgn0086355;FBgn0000579;FBgn0250906;FBgn0000064;FBgn0014869;FBgn0003071;FBgn0001186
dme00500	Starch and sucrose metabolism	http://www.kegg.jp/kegg-bin/show_pathway?dme00500+45875+326264+44010+41823+33386	33	5	0.289928	17.2457	7.21e-06	0.000233	45875;326264;44010;41823;33386	FBgn0266064;FBgn0004507;FBgn0053138;FBgn0001186;FBgn0003076
dme01100	Metabolic pathways	http://www.kegg.jp/kegg-bin/show_pathway?dme01100+38746+35671+43447+33351+43582+45875+33461+41457+326264+31376+36060+44010+43183+53502+41823+33386+32545+37415+34215	1012	19	8.89112	2.13696	8.85e-05	0.00209484	38746;35671;43447;33351;43582;45875;33461;41457;326264;31376;36060;44010;43183;53502;41823;33386;32545;37415;34215	FBgn0001092;FBgn0086355;FBgn0000579;FBgn0250906;FBgn0000064;FBgn0014869;FBgn0260746;FBgn0266064;FBgn0025885;FBgn0003071;FBgn0004507;FBgn0053138;FBgn0001186;FBgn0003076;FBgn0032078;FBgn0040251;FBgn0005626;FBgn0262738;FBgn0003162
dme00051	Fructose and mannose metabolism	http://www.kegg.jp/kegg-bin/show_pathway?dme00051+43582+45875+36060+43183	29	4	0.254785	15.6995	9.74e-05	0.00209484	43582;45875;36060;43183	FBgn0086355;FBgn0000064;FBgn0003071;FBgn0001186
dme00052	Galactose metabolism	http://www.kegg.jp/kegg-bin/show_pathway?dme00052+45875+41457+36060+44010	37	4	0.325071	12.305	0.000258	0.00475708	45875;41457;36060;44010	FBgn0260746;FBgn0003071;FBgn0001186;FBgn0003076
dme00030	Pentose phosphate pathway	http://www.kegg.jp/kegg-bin/show_pathway?dme00030+36060+44010+43183	24	3	0.210857	14.2277	0.00108688	0.017526	36060;44010;43183	FBgn0000064;FBgn0003071;FBgn0003076
dme00790	Folate biosynthesis	http://www.kegg.jp/kegg-bin/show_pathway?dme00790+38746+38972+37415	40	3	0.351428	8.53661	0.00482918	0.0692182	38746;38972;37415	FBgn0035904;FBgn0005626;FBgn0003162
dme00562	Inositol phosphate metabolism	http://www.kegg.jp/kegg-bin/show_pathway?dme00562+35671+43582+31376	47	3	0.412928	7.2652	0.00760667	0.098126	35671;43582;31376	FBgn0086355;FBgn0025885;FBgn0262738

## Sheet: br-repressed
Table S3: KEGG pathway analysis results for genes differentially regulated between w1118 and br5 leg imaginal discs
Sheet 2: KEGG pathway analysis results for genes down-regulated in w1118 leg imaginal discs
geneSet	description	link	size	overlap	expect	enrichmentRatio	pValue	FDR	overlapId	userId
dme00410	beta-Alanine metabolism	http://www.kegg.jp/kegg-bin/show_pathway?dme00410+45398+40675+34256	18	3	0.24851	12.072	0.00173414	0.150187	45398;40675;34256	FBgn0010548;FBgn0023023;FBgn0012036
dme00340	Histidine metabolism	http://www.kegg.jp/kegg-bin/show_pathway?dme00340+45398+34256	8	2	0.110449	18.108	0.00494872	0.150187	45398;34256	FBgn0010548;FBgn0012036
dme00360	Phenylalanine metabolism	http://www.kegg.jp/kegg-bin/show_pathway?dme00360+45398+38871	8	2	0.110449	18.108	0.00494872	0.150187	45398;38871	FBgn0010548;FBgn0001208
dme00981	Insect hormone biosynthesis	http://www.kegg.jp/kegg-bin/show_pathway?dme00981+37182+34256+32857	27	3	0.372764	8.04798	0.00570023	0.150187	37182;34256;32857	FBgn0012036;FBgn0004959;FBgn0034406
dme00010	Glycolysis / Gluconeogenesis	http://www.kegg.jp/kegg-bin/show_pathway?dme00010+45398+37131+34256+39841	55	4	0.759335	5.26777	0.00646111	0.150187	45398;37131;34256;39841	FBgn0003067;FBgn0010548;FBgn0012036;FBgn0026061
dme00250	Alanine, aspartate and glutamate metabolism	http://www.kegg.jp/kegg-bin/show_pathway?dme00250+38753+33172+42832	29	3	0.400377	7.49295	0.00698544	0.150187	38753;33172;42832	FBgn0001098;FBgn0001142;FBgn0041194
dme00983	Drug metabolism	http://www.kegg.jp/kegg-bin/show_pathway?dme00983+40675+37108+37111+48336+41896	97	5	1.33919	3.7336	0.0099884	0.183705	40675;37108;37111;48336;41896	FBgn0010039;FBgn0038349;FBgn0063497;FBgn0023023;FBgn0063494
dme01230	Biosynthesis of amino acids	http://www.kegg.jp/kegg-bin/show_pathway?dme01230+36020+48552+33172+38871	66	4	0.911202	4.38981	0.0122328	0.183705	36020;48552;33172;38871	FBgn0005278;FBgn0001142;FBgn0027580;FBgn0001208
dme00982	Drug metabolism	http://www.kegg.jp/kegg-bin/show_pathway?dme00982+45398+37108+37111+48336	68	4	0.938814	4.2607	0.0135496	0.183705	45398;37108;37111;48336	FBgn0010039;FBgn0010548;FBgn0063497;FBgn0063494
dme00980	Metabolism of xenobiotics by cytochrome P450	http://www.kegg.jp/kegg-bin/show_pathway?dme00980+45398+37108+37111+48336	69	4	0.95262	4.19895	0.0142407	0.183705	45398;37108;37111;48336	FBgn0010039;FBgn0010548;FBgn0063497;FBgn0063494
